# Supplementary material for: Variation in Protein and Isoflavone Contents of Collected Domestic and Foreign Soybean (Glycine max (L.) Merrill) Germplasms in Korea
Source: MDPI journal article supplement (doi:10.3390/agriculture11080735), 2021-08-02
Supplement: s1 [file s1]

**Table S1.** Calibration equations of isoflavone standards

| Isoflavone | Equation of linear regression | Coefficient of determination ( $R^2$ ) | Linearity range ( $\mu\text{mol/ml}$ ) |
|------------|-------------------------------|----------------------------------------|----------------------------------------|
| Daidzein   | $y = 108.43x - 1.778$         | 1                                      | 1–30                                   |
| Glycitein  | $y = 92.292x - 0.5878$        | 1                                      | 0.25–10                                |
| Genistein  | $y = 141.91x - 1.9569$        | 1                                      | 1–20                                   |

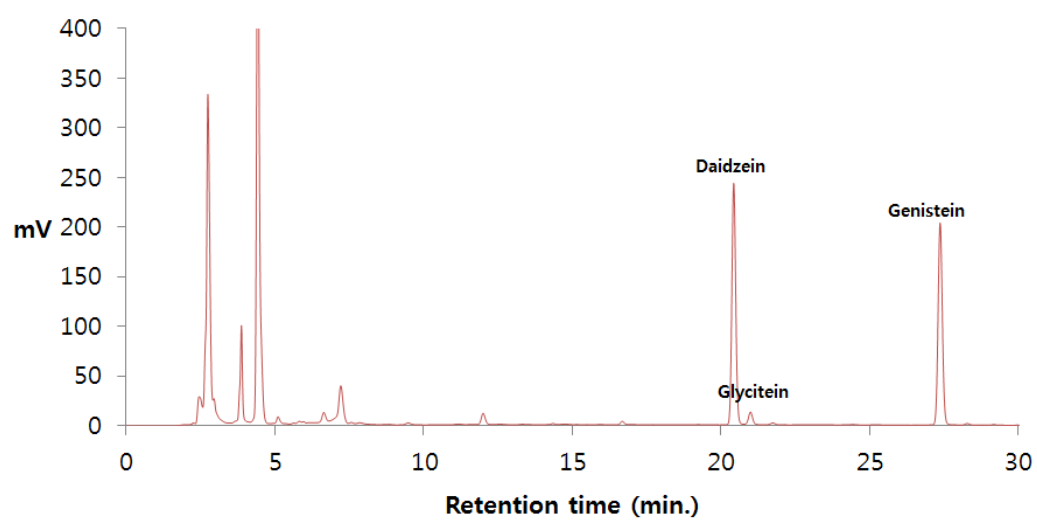

**Figure S1.** HPLC chromatogram patterns (UV 254 nm) of seed isoflavones.

**Table S2.** Analytical conditions of HPLC for isoflavone

| Parameter           | Condition                                                                                       |
|---------------------|-------------------------------------------------------------------------------------------------|
| Instrument          | Waters 600 pump & controller, Waters 717 autosampler,<br>Waters 486 tunable absorbance detector |
| Wavelength          | 254 nm                                                                                          |
| Mobile phase        | Acetonitrile: Water + 0.1% Acetic acid =<br>Acetonitrile 20 → 50%/30min (gradient)              |
| Flow rate           | 1.0 mL/min                                                                                      |
| injection<br>volume | 20 $\mu$ l                                                                                      |
| Column              | YMC-PACK Pro C18 column (250 X 4.6 mm)                                                          |

**Table S3.** Maximum, minimum and mean value of protein contents in soybean germplasms

|                                    | <b>Max.</b> | <b>Min.</b> | <b>Mean</b> | <b>±SD</b> | <b>CV(%)</b> |
|------------------------------------|-------------|-------------|-------------|------------|--------------|
| Protein<br>(g 100g <sup>-1</sup> ) | 44.5        | 28.7        | 39          | 2.4        | 2.2          |

**Table S4.** Selected accessions for its high protein contents

| IT No.   | Protein<br>(g 100g <sup>-1</sup> ) | Country | Seed<br>color | Seed<br>size | 100 Seed<br>weight(g) |
|----------|------------------------------------|---------|---------------|--------------|-----------------------|
| IT263050 | 44.5                               | CHN*    | Black         | Medium<br>※  | 20.2                  |
| IT101111 | 44.0                               | KOR     | Yellow        | Large        | 28.9                  |
| IT24921  | 43.8                               | CHN     | Yellow        | Medium       | 21.7                  |
| IT167907 | 43.8                               | KOR     | Yellow        | Small        | 11.8                  |
| IT102595 | 43.6                               | KOR     | Yellow        | Small        | 12.2                  |
| IT161574 | 43.5                               | CHN     | Yellow        | Medium       | 20.7                  |

\*CHN: China, KOR: Korea

※Large(100 seed weight: 24g~), Medium(100 seed weight: 13~24g), Small(100 seed weight: ~13g)

**Table S5.** Maximum, minimum and mean value of Isoflavone contents in soybean germplasms.

| Statistics                | Isoflavone contents ( $\mu\text{g g}^{-1}$ ) |           |           |        |
|---------------------------|----------------------------------------------|-----------|-----------|--------|
|                           | Daidzein                                     | Glycitein | Genistein | Total  |
| <b>Max.</b>               | 2081.4                                       | 443.7     | 1378.4    | 3561.8 |
| <b>Min.</b>               | 56.4                                         | 17.7      | 28.2      | 207.0  |
| <b>Mean</b>               | 338.4                                        | 126.0     | 424.2     | 888.8  |
| <b><math>\pm</math>SD</b> | 207.0                                        | 67.1      | 197.6     | 411.2  |
| <b>CV(%)</b>              | 61.2                                         | 53.3      | 46.6      | 46.3   |

**Table S6.** Selected accessions for its high isoflavone contents

| IT No.   | Country | Seed color | Seed size <sup>*</sup> | Isoflavone contents( $\mu\text{g g}^{-1}$ ) |           |           |        |
|----------|---------|------------|------------------------|---------------------------------------------|-----------|-----------|--------|
|          |         |            |                        | Daidzein                                    | Glycitein | Genistein | Total  |
| IT262889 | JPN*    | Yellow     | Medium                 | 2081.4                                      | 101.96    | 1378.4    | 3561.8 |
| IT171009 | CHN     | Brown      | Small                  | 1015.9                                      | 305.9     | 949.1     | 2271.0 |
| IT100869 | JPN     | Yellow     | Large                  | 923.13                                      | 182.6     | 1144.7    | 2250.5 |
| IT208248 | USA     | Brown      | Small                  | 829.37                                      | 443.7     | 906.2     | 2179.3 |
| IT142911 | USA     | Black      | Small                  | 1043.0                                      | 373.3     | 612.3     | 2028.7 |
| IT142854 | USA     | Black      | Small                  | 1060.4                                      | 314.9     | 641.8     | 2017.1 |

\* JPN: Japan, CHN: China, USA: United States of America

<sup>\*</sup>Large(100 seed weight: 24g~), Medium(100 seed weight: 13~24g), Small(100 seed weight: ~13g)
